1 **A highly conserved complete accessory *Escherichia coli* type III secretion system 2 is**  
2 **widespread in bloodstream isolates of the ST69 lineage**

3

4 Fox, S.<sup>a</sup>, Goswami, C.<sup>a</sup>, Holden, M.<sup>b</sup>, Connolly, J.P.R., Roe, A.<sup>a</sup>, Connor, M.<sup>c</sup>, Leanord, A.<sup>a</sup>, and  
5 Evans, T.J.<sup>a#</sup>

6 <sup>a</sup> Institute of Infection, Immunity and Inflammation, University of Glasgow, Glasgow, UK

7 <sup>b</sup> School of Medicine, University of St. Andrews, UK

8 <sup>c</sup> Dumfries and Galloway Royal Infirmary, Dumfries, UK

9 <sup>#</sup> Corresponding author: [tom.evans@glasgow.ac.uk](mailto:tom.evans@glasgow.ac.uk)

10

11 Running Head: Type III secretion system 2 in *E. coli* strain ST69

12

13

14

15

16

17 Word count:

18 Abstract: 220

19 Text: 2639

20

21

22

23

## 24 **Abstract**

25           Bacterial type III secretion systems (T3SS) play an important role in pathogenesis of  
26 Gram-negative infections. Enteropathogenic and enterohemorrhagic *Escherichia coli* contain  
27 a well-defined T3SS but in addition a second T3SS termed *E. coli* T3SS 2 (ETT2) has been  
28 described in a number of strains of *E. coli*. The majority of *E. coli* contain elements of a  
29 genetic locus encoding ETT2, but which has undergone significant mutational attrition  
30 rendering it without predicted function. Only a very few strains have been reported to  
31 contain an intact ETT2 locus. To investigate the occurrence of the ETT2 locus in strains of  
32 human pathogenic *E. coli*, we carried out genomic sequencing of 162 isolates obtained from  
33 patient blood cultures in Scotland. We found that all 26 ST69 isolates from this collection  
34 contained an intact ETT2 together with an associated *eip* locus which encodes putative  
35 secreted ETT2 effectors as well as *eilA*, a gene encoding a putative transcriptional regulator  
36 of ETT2 associated genes. Using a reporter gene for *eilA* activation, we defined conditions  
37 under which this gene was differentially activated. However, comparison of secreted  
38 proteins from ST69 strains under high and low *eilA* activation failed to identify any ETT2  
39 secreted substrates. The conservation of the genes encoding ETT2 in human pathogenic  
40 ST69 strains strongly suggests it has functional importance in infection, although its exact  
41 functional role remains obscure.

## 42 **Importance**

43           One of the commonest bacteria causing bloodstream infections in humans is  
44 *Escherichia coli*, which has a significant morbidity and mortality. Better understating of the  
45 mechanisms by which this microbe can invade blood could lead to more effective  
46 prevention and treatment. One mechanism by which some strains cause disease is by  
47 elaboration of a specialized secretion system, the type III secretion system (T3SS), encoded

48 by the locus of enterocyte effacement (LEE). In addition to this well-defined T3SS, a second  
49 T3SS has been found in some *E. coli* strains termed *E. coli* type III secretion system 2 (ETT2).  
50 Most strains carry elements of the ETT2 locus, but with significant mutational attrition  
51 rendering it functionless. The significance of our work is that we have discovered that  
52 human bloodstream isolates of *E. coli* of sequence type 69 contain a fully intact ETT2 and  
53 associated genes, strongly suggesting its functional importance in human infection.

54

55

56

57

## 58 Introduction

59 Pathogenic bacteria possess a number of different secretion systems that facilitate  
60 host infection as well as interbacterial competition(1). One of these is the type III secretion  
61 system (T3SS), which is found in a number of different Gram-negative pathogens and is key  
62 to the ability of these microbes to cause disease(2-4). Broadly, T3SS comprise two elements:  
63 a highly conserved multiprotein structural complex that forms the conduit between the  
64 bacterial and the host cell; and various effector proteins that are translocated through this  
65 channel. Genes encoding the T3SS channel, or needle complex, are contained within  
66 pathogenicity islands comprised of a single cluster of genes(5). Genes encoding effectors are  
67 more widely spread within the genome and vary greatly between different bacterial species.

68 Certain strains of *Escherichia coli* possess a well-defined T3SS, notably  
69 enteropathogenic *E. coli* (EPEC) and enterohaemorrhagic *E. coli* (EHEC). This T3SS is encoded  
70 on the locus of enterocyte effacement (LEE) and in concert with its secreted effectors,  
71 produces the characteristic attaching and effacing lesions that mediate close attachment of  
72 the pathogen with the intestinal epithelial wall(6). Whole genome sequencing of strains of  
73 EHEC revealed the presence of a putative additional T3SS(7, 8), which has been termed *E.*  
74 *coli* T3SS 2 (ETT2). Further studies attempted to delineate the frequency with which this  
75 ETT2 locus was found in different *E. coli* strains(9-11). However, a further study by Ren et  
76 al(12) showed that the ETT2 locus was present in many lineages of *E.coli*, but had  
77 undergone extensive mutational attrition. The phylogenetic analysis showed that ETT2 was  
78 absent in what is thought to be the oldest phylogroup of *E.coli*, B2(13, 14), which contains  
79 many uropathogenic *E. coli*, but had been acquired by the divergence of the next oldest  
80 phylogroup, D. Analysis showed multiple inactivating mutations were present within the  
81 locus, which would render the T3SS functionless, including the ETT2 locus in the EHEC O157

82 strains in which it was originally described. However, a complete and potentially fully  
83 functional ETT2 was found in the enteroadhesive *E. coli* O42 (EAEC O42) strain; other *E. coli*  
84 strains analysed either had no ETT2 locus, or it had undergone extensive deletion and/or  
85 mutational inactivation. Ren et al also showed that *E. coli* strains with the most intact ETT2  
86 locus also carried an additional T3SS-like island adjacent to the *selC* tRNA gene, the *eip*  
87 locus, which encoded homologues of translocated proteins from the Salmonella  
88 pathogenicity island I (Spi-1) T3SS, as well as genes encoding a transcriptional regulator  
89 (*eilA*), a chaperone (*eicA*) and an outer membrane invasion/intimin-like protein (*eaeX*)(12,  
90 15).

91 Functional effects of ETT2 remain unclear. Mutational analysis of the ETT2 cluster in  
92 an avian pathogenic *E. coli* showed it had reduced virulence, even though the cluster had  
93 undergone mutational attrition and could not encode a functional T3SS, suggesting  
94 potential alternative roles in pathogenesis(16). Other studies have also suggested a role for  
95 proteins encoded in the ETT2 in virulence of avian pathogenic *E. coli* and K1 strains(17-19). A  
96 recent study examined the role of the putative transcriptional regulator gene *eilA* at the *selC*  
97 locus in EAEC strain O42(15). This demonstrated that *eilA* was responsible for regulating  
98 transcription of genes within the *selC* locus, as well as *eivF* and *eivA* within the ETT2 locus.  
99 Mutants lacking *eilA* were less adherent to epithelial cells and had reduced biofilm  
100 formation; this phenotype was also observed for mutants in the *eaeX* gene which encodes  
101 the invasin/intimin homologue. This suggested important functional roles of the *selC* and  
102 ETT2 loci in pathogenesis of this strain of *E. coli*.

103 Hitherto, there is no evidence of intact ETT2 in human pathogenic strains of  
104 *E. coli* other than a few strains of EAEC. However, given the findings described above, we  
105 hypothesised that ETT2 might be of importance in human infections caused by *E. coli*

106 phylogroups other than B2. We have studied 162 isolates of *E. coli* isolated from bacteremic  
107 patients in Scotland from 2013 and 2015, which we have subjected to whole genome  
108 sequencing. Within this group, we identified 26 strains of *E. coli* sequence type (ST) 69, of  
109 phylogroup D, which were largely derived from community-acquired sources. Virtually all of  
110 these strains had a completely intact ETT2 and *se/C* operon, with no inactivating mutations.  
111 Similarly, intact ETT2/*se/C* operons were also found in some minor ST types in our collection.  
112 The *eilA* transcriptional regulator was functional in these strains. Our results show that an  
113 intact ETT2 locus is widely present in human pathogenic *E. coli* ST69 strains, suggesting a  
114 functional role for this cryptic T3SS in human disease.

115

116

## 117 Results

118 We have performed whole genome sequencing and analysis of 162 isolates of  
119 *Escherichia coli* obtained from blood cultures of patients within Scotland in 2013 and  
120 2015(20). Sequence comparisons with other isolates of *E. coli* showed that strains belonging  
121 to ST69 contained an intact ETT2 operon. The gene content of this operon from one of these  
122 ST69 strains, ST69 1\_9, was compared to the complete ETT2 found in enteroadhesive *E. coli*  
123 strain 042 (EAEC 042) and the degenerate ETT2 found in *E. coli* O157:H7 Sakai (Figure 1). An  
124 intact ETT2 operon in this ST69 strain was found in the ~30 kb region spanning the *yqeG*  
125 gene and the tRNA gene *gluU* with over 98% identity to the ETT2 operon in EAEC 042.  
126 Importantly, this operon did not contain any of the inactivating mutations found in the *E.*  
127 *coli* O157:H7 Sakai strain.

128 We extended this analysis to compare all of the ST69 strains in our collection over  
129 this region. Of 26 ST69 genomes sequenced, 24 were assembled in one contig covering this  
130 region, shown compared to each other in Figure 2. In all these assemblies, there was a  
131 greater than 95% identity between the sequences. Two strains appeared to lack the  
132 extreme left-hand end of the complete ETT2 operon (ECO#35 and EC1#2), and two strains  
133 had a stop codon in the *epaO* gene at the same site as noted for *E. coli* O157:H7 Sakai  
134 (EC1#70 and ECO1#18). *epaO* is homologous to the *Salmonella typhimurium* Type III  
135 secretion system gene, *spaO*, which encodes a protein that forms part of the cytoplasmic  
136 sorting platform essential for energizing and sorting substrates for delivery to the needle  
137 complex(21). *spaO* is essential for type III secretion in *S. typhimurium*(22). Recent work has  
138 shown that *spaO* produces two protein products by tandem translation: a full-length protein  
139 and a shorter C terminal portion that is translated from an internal ribosome binding site  
140 and alternative initiator codon(23). Both are needed for functionality of the type III

141 secretion system in *Salmonella typhimurium*, so the loss of the full-length product of *epaO*  
142 will likely also render the ETT2 non-functional.

143 Next, we analysed other STs within our collection of bacteremic isolates for the  
144 presence of the ETT 2 operon (Figure 3). 4 non-ST69 isolates contained an essentially intact  
145 ETT2 region, belonging to ST405, 38, 362 and 349. These were group into phylogroups F, D,  
146 unknown and unknown respectively; all are closely related to ST69 (supplementary Figure  
147 1). Other strains showed variable loss and/or degradation of the locus as previously  
148 described, Notably, none of the common epidemic strain ST131 (phylogroup B2) contains  
149 any elements of this ETT2 region – one representative example is shown at the bottom of  
150 Figure 3.

151 Closely associated with an intact ETT2 region is a group of genes related to type III  
152 secretion effectors adjacent to the *selC* tRNA gene(12, 15). Two distinct genome insertions  
153 were noted at this site: *selC-A* and *selC-B*. Comparison of this region with representative  
154 ST69 and other strains compared to EAEC 042 is shown in Figure 4. In EAEC 042 *selC-A* lies  
155 between an intact copy of the *selC* gene and a 21 bp direct repeat of the 3' end of the *selC*  
156 tRNA gene. Three backbone genes then intervene (*yicK*, *yicL*, *nlpA*) before the region of the  
157 *selC-B* region. *selC-A* contains mainly phage related genes. *selC-B* contains homologues of  
158 putative type III secretion effectors (*eipB*, *eipX* and *eipD*), a putative type III effector  
159 chaperone, *eicA*, a transcriptional regulator *eilA*, and a gene *eaex*, which encodes a large  
160 protein containing bacterial immunoglobulin repeats with homology to outer membrane  
161 adhesion/invasion protein invasion found in *Yersinia* spp. as well as intimins of invasive *E.*  
162 *coli* strains. All ST69 strains in our isolates contained the *selC-B* locus with over 95% identity  
163 to the EAEC 042 region. The variations were found within the central domain of the EaeX  
164 product, which contains the bacterial immunoglobulin repeats, with variation in the number



165 of repeats contained within this domain. A similar region was also found in 5 non-ST69  
166 isolates; 4 in ST59 strains and one ST349 strain that also possessed the ETT2 locus. As with  
167 the ETT2 locus, the *Se/C*-B region was entirely missing in ST131 isolates. The *se/C*-A region  
168 was largely absent from our isolates but was partially present in one of the ST60 isolates  
169 (ECO#72, figure 4).

170 *EilA* has been shown to regulate genes within the *Se/C*-B region as well as the ETT2  
171 island adjacent to the tRNA *glyU* gene (15). We wished to determine if we could define  
172 conditions under which *eilA* was transcriptionally active, and hence activating the ETT2  
173 island. We constructed a reporter gene containing 500 bp of upstream sequence from the  
174 *eilA* gene found in the neonatal meningitis associated *E coli* strain CE10(24). Using this  
175 reporter in 5 of our ST69 isolates containing the ETT2 locus, we could readily detect reporter  
176 gene activity that peaked in the late log phase of growth in equal parts LB and Dulbecco's  
177 Modified Eagle's Medium (LB:DMEM media) (Fig 5A and B). Previous studies of  
178 transcriptional activation of the LEE have shown this is maximal in less rich media designed  
179 for growth of eukaryotic cells such as DMEM compared to the rich medium LB(25, 26).  
180 Following optimization of growth in different media, we compared transcriptional activity of  
181 the *eilA* reporter construct in an ST69 strain grown in LB alone compared to the 1: 1 mixture  
182 of LB and DMEM (Fig 5C and D). Growth in the different media was not significantly  
183 different but induction of the promoter was much more marked in the LB:DMEM mix. In an  
184 attempt to identify proteins potentially secreted into the growth media by ETT2, we  
185 compared the pattern of secreted proteins from an ST69 strain with intact ETT2 between  
186 the two different media (Fig S2). Two secreted proteins were predominantly found in the  
187 bacteria grown in the LB:DMEM mix that we postulated could be potentially secreted by the  
188 ETT2. These were cut from the stained gel and subjected to identification by MALDI-MS/MS

189 (Supplementary Table 1). The best matches for these two proteins were the molecular  
190 chaperones ClpB and DnaK respectively, which are both molecular chaperones important in  
191 refolding aggregated proteins and in protein secretion(27). Neither are putative T3SS  
192 substrates.  
193

## 194 Discussion

195 We report here the presence of genomic regions encoding ETT2 and associated  
196 putative T3SS effectors within *E. coli* ST69 isolates from bacteremic patients within Scotland.  
197 In virtually all of the isolates, the two regions encoding these proteins contained a full  
198 complement of genes with no deletion, insertions or inactivating mutations suggesting that  
199 the ETT2 and associated effectors could be functionally active. This is in contrast to the vast  
200 majority of ETT2 sequences reported to date, which have undergone significant mutational  
201 attrition. The conserved nature of the ETT2 sequences reported here strongly suggests that  
202 there has been selection pressure for these regions to be conserved within the ST69 lineage.

203 ST69 belongs to phylogroup D of the *E. coli* lineage. We did not detect ETT2 in *E. coli*  
204 of ST131, which is phylogroup B2. Although not completely clear, our data are in agreement  
205 with the origin of the different phylogroups as discussed by Ren et al.(12), who suggest that  
206 ETT2 is not present in the ancestral B2 phylogroup but was acquired at some point in the  
207 evolution of the D group. Subsequent lineages show significant mutational attrition of the  
208 ETT2 locus, although our data show strong conservation in the isolates of ST69 we studied  
209 here. ST69 is one of the common STs found in bloodstream isolates of *E. coli*. In our  
210 collection, ST69 was mostly found in infections acquired from the community(20). The  
211 natural environment of these human pathogenic *E. coli* is the gastrointestinal tract; passage  
212 into blood is predominantly through ascending infection into the bladder and renal tract.  
213 Evolutionary pressure to retain ETT2 might therefore have arisen through its ability to  
214 provide a selective advantage in gut colonization and/or in infection of the renal tract.

215 However, the functional effects of ETT2 remain obscure. In strains with a disrupted  
216 ETT2, genetic deletion does seem to confer a changed phenotype, suggesting that even  
217 these apparently non-functional regions have a pathogenic role(19). Additionally,

218 experiments in avian strains with ETT2 also suggest a functional role for the ETT2 in  
219 pathogenesis(17). ETT2 has also been implicated in the control of gene expression from the  
220 locus of enterocyte effacement in enterohemorrhagic *E. coli* O157(28). We could not  
221 identify any putative secreted ETT2 substrates from the ST69 strains reported here. A recent  
222 study of *E. coli* serotype O2 that causes avian coccobacillosis also failed to identify potential  
223 ETT2 secreted proteins, but did find that the intact ETT2 mediated expression and secretion  
224 of flagellar proteins, as well as other changes in cell surface behaviour(29). It may be that  
225 the conditions under which the ETT2 mediates secretion have not been identified, or that it  
226 carries out different functions.

227         In summary therefore, we show here that the ST69 strain of human pathogenic *E.*  
228 *coli* has an intact genetic locus for ETT2 and associated proteins. The preservation of these  
229 sequences in the ST69 strain argue strongly that its functional effects confer a significant  
230 selection advantage. However, its exact functional effects remain obscure.

231

## 232 **Materials and Methods**

### 233 *Sequencing and genome analysis*

234 Whole genome sequencing of 162 strains of E coli from human clinical samples were  
235 collected and sequenced as previously described(20). The raw Illumina reads were mapped  
236 to the E. coli reference genome EAEC 042 (accession number GCA\_000027125.1) using  
237 SAMtools mpileup(30) and were called for SNPs through VarScan(31) (read depth  $\geq 2x$ ,  
238 variant allele frequency  $\geq 0.08$  and p-value  $\geq 0.005$ ). Mobile genetic elements (MGEs) were  
239 masked and recombination filtration was performed using Gubbins(32). Maximum  
240 likelihood (ML) trees were inferred using RAxML(33) with generalized time-reversible (GTR)  
241 model and a Gamma distribution to model site-specific rate variation. One hundred  
242 bootstraps were conducted for the support of the SNP based ML phylogenetic tree.  
243 Comparison between selected sequences were made and visualised using Easyfig(34)

### 244 *Growth and eilA reporter assay*

245 Growth media used in this study were DMEM (Invitrogen, UK), LB, and a 1:1 mix of LB with  
246 DMEM. The eilA reporter construct contains a ~500bp fragment upstream of the eilA  
247 promoter from the CE10 strain that was cloned into a plasmid (pAJR70) used in a previous  
248 study for the assessment of transcription of ETT1 operons by enhanced green fluorescent  
249 protein (GFP) monitoring from liquid culture (35). The plasmid was transfected into the  
250 different bacterial strains using standard methods. Chloramphenicol (25 $\mu$ g/ml) was added  
251 to media when required for the selection of strains containing the eilA reporter. Induction  
252 of GFP in the different media at 37°C was measured using a fluorescence plate-reader  
253 (FLUOstar Optima; BMG; Labtech, UK). Optical densities and fluorescence were recorded  
254 every 24 minutes for 9 hours.

### 255 *Secretion Assay*

256 Secreted protein assays were extracted by trichloroacetic acid precipitation performed as  
257 previously described (36). Briefly, overnight LB cultures were diluted 1/100 in 50ml of the  
258 culture media and grown for 9 hours before precipitation of secreted proteins. Secreted  
259 proteins were resuspended in 150µl of loading buffer and analysed by SDS-PAGE.

#### 260 *Accession numbers*

261 Illumina sequences are deposited in the European Nucleotide Archive (ENA:  
262 [www.ebi.ac.uk/ena](http://www.ebi.ac.uk/ena)) under project PRJEB12513.

263

#### 264 **Acknowledgements**

265 The work was funded by the Scottish Executive via the Chief Scientists Office through the  
266 provision of a grant to establish the Scottish Healthcare Associated Infection Prevention  
267 Institute (SHAIPi). The funders had no role in the study design, data collection and  
268 interpretation, or the decision to submit the work for publication.

269

## References

- 270  
271  
272 1. Green ER, Meccas J. 2016. Bacterial Secretion Systems: An Overview. *Microbiol*  
273 *Spectr* 4.
- 274 2. Cornelis GR. 2006. The type III secretion injectisome. *Nat Rev Microbiol* 4:811-25.
- 275 3. Mota LJ, Cornelis GR. 2005. The bacterial injection kit: type III secretion systems. *Ann*  
276 *Med* 37:234-49.
- 277 4. Deng W, Marshall NC, Rowland JL, McCoy JM, Worrall LJ, Santos AS, Strynadka NCJ,  
278 Finlay BB. 2017. Assembly, structure, function and regulation of type III secretion  
279 systems. *Nat Rev Microbiol* 15:323-337.
- 280 5. Hueck CJ. 1998. Type III protein secretion systems in bacterial pathogens of animals  
281 and plants. *Microbiol Mol Biol Rev* 62:379-433.
- 282 6. Stevens MP, Frankel GM. 2014. The Locus of Enterocyte Effacement and Associated  
283 Virulence Factors of Enterohemorrhagic *Escherichia coli*. *Microbiol Spectr* 2:EHEC-  
284 0007-2013.
- 285 7. Hayashi T, Makino K, Ohnishi M, Kurokawa K, Ishii K, Yokoyama K, Han CG, Ohtsubo  
286 E, Nakayama K, Murata T, Tanaka M, Tobe T, Iida T, Takami H, Honda T, Sasakawa C,  
287 Ogasawara N, Yasunaga T, Kuhara S, Shiba T, Hattori M, Shinagawa H. 2001.  
288 Complete genome sequence of enterohemorrhagic *Escherichia coli* O157:H7 and  
289 genomic comparison with a laboratory strain K-12. *DNA Res* 8:11-22.
- 290 8. Perna NT, Plunkett G, 3rd, Burland V, Mau B, Glasner JD, Rose DJ, Mayhew GF, Evans  
291 PS, Gregor J, Kirkpatrick HA, Posfai G, Hackett J, Klink S, Boutin A, Shao Y, Miller L,  
292 Grotbeck EJ, Davis NW, Lim A, Dimalanta ET, Potamouisis KD, Apodaca J,  
293 Anantharaman TS, Lin J, Yen G, Schwartz DC, Welch RA, Blattner FR. 2001. Genome  
294 sequence of enterohaemorrhagic *Escherichia coli* O157:H7. 0028-0836 409:529-33.

- 295 9. Hartleib S, Prager R, Hedenstrom I, Lofdahl S, Tschape H. 2003. Prevalence of the  
296 new, SPI1-like, pathogenicity island ETT2 among *Escherichia coli*. *Int J Med Microbiol*  
297 292:487-93.
- 298 10. Makino S, Tobe T, Asakura H, Watarai M, Ikeda T, Takeshi K, Sasakawa C. 2003.  
299 Distribution of the secondary type III secretion system locus found in  
300 enterohemorrhagic *Escherichia coli* O157:H7 isolates among Shiga toxin-producing *E.*  
301 *coli* strains. *J Clin Microbiol* 41:2341-7.
- 302 11. Miyazaki J, Ba-Thein W, Kumao T, Akaza H, Hayashi H. 2002. Identification of a type  
303 III secretion system in uropathogenic *Escherichia coli*. *FEMS Microbiol Lett* 212:221-  
304 8.
- 305 12. Ren CP, Chaudhuri RR, Fivian A, Bailey CM, Antonio M, Barnes WM, Pallen MJ. 2004.  
306 The ETT2 gene cluster, encoding a second type III secretion system from *Escherichia*  
307 *coli*, is present in the majority of strains but has undergone widespread mutational  
308 attrition. *J Bacteriol* 186:3547-60.
- 309 13. Sims GE, Kim SH. 2011. Whole-genome phylogeny of *Escherichia coli*/Shigella group  
310 by feature frequency profiles (FFPs). *Proc Natl Acad Sci U S A* 108:8329-34.
- 311 14. Lecointre G, Rachdi L, Darlu P, Denamur E. 1998. *Escherichia coli* molecular  
312 phylogeny using the incongruence length difference test. *Mol Biol Evol* 15:1685-95.
- 313 15. Sheikh J, Dudley EG, Sui B, Tamboura B, Suleman A, Nataro JP. 2006. EilA, a HilA-like  
314 regulator in enteroaggregative *Escherichia coli*. *Mol Microbiol* 61:338-50.
- 315 16. Ideses D, Gophna U, Paitan Y, Chaudhuri RR, Pallen MJ, Ron EZ. 2005. A degenerate  
316 type III secretion system from septicemic *Escherichia coli* contributes to  
317 pathogenesis. *J Bacteriol* 187:8164-71.



- 318 17. Wang S, Xu X, Liu X, Wang D, Liang H, Wu X, Tian M, Ding C, Wang G, Yu S. 2017.  
319 Escherichia coli type III secretion system 2 regulator EtrA promotes virulence of  
320 avian pathogenic Escherichia coli. *J Clin Microbiol* 155:1515-1524.
- 321 18. Wang S, Liu X, Xu X, Yang D, Wang D, Han X, Shi Y, Tian M, Ding C, Peng D, Yu S. 2016.  
322 Escherichia coli Type III Secretion System 2 ATPase EivC Is Involved in the Motility  
323 and Virulence of Avian Pathogenic Escherichia coli. *Front Microbiol* 7:1387.
- 324 19. Yao Y, Xie Y, Perace D, Zhong Y, Lu J, Tao J, Guo X, Kim KS. 2009. The type III secretion  
325 system is involved in the invasion and intracellular survival of Escherichia coli K1 in  
326 human brain microvascular endothelial cells. *FEMS Microbiol Lett* 300:18-24.
- 327 20. Goswami C, Fox S, Holden M, Connor M, Leanord A, Evans TJ. 2018. Genetic analysis  
328 of invasive Escherichia coli in Scotland reveals determinants of healthcare-associated  
329 versus community-acquired infections. *Microb Genom* doi:10.1099/mgen.0.000190.
- 330 21. Lara-Tejero M, Kato J, Wagner S, Liu X, Galan JE. 2011. A sorting platform determines  
331 the order of protein secretion in bacterial type III systems. *Science* 331:1188-91.
- 332 22. Collazo CM, Galan JE. 1996. Requirement for exported proteins in secretion through  
333 the invasion-associated type III system of Salmonella typhimurium. *Infect Immun*  
334 64:3524-31.
- 335 23. Song M, Sukovich DJ, Ciccarelli L, Mayr J, Fernandez-Rodriguez J, Mirsky EA, Tucker  
336 AC, Gordon DB, Marlovits TC, Voigt CA. 2017. Control of type III protein secretion  
337 using a minimal genetic system. *Nat Commun* 8:14737.
- 338 24. Lu S, Zhang X, Zhu Y, Kim KS, Yang J, Jin Q. 2011. Complete genome sequence of the  
339 neonatal-meningitis-associated Escherichia coli strain CE10. *J Bacteriol* 193:7005.

- 340 25. Puente JL, Bieber D, Ramer SW, Murray W, Schoolnik GK. 1996. The bundle-forming  
341 pili of enteropathogenic *Escherichia coli*: transcriptional regulation by environmental  
342 signals. *Mol Microbiol* 20:87-100.
- 343 26. Leverton LQ, Kaper JB. 2005. Temporal expression of enteropathogenic *Escherichia*  
344 *coli* virulence genes in an in vitro model of infection. *Infect Immun* 73:1034-43.
- 345 27. Lund PA. 2001. Microbial molecular chaperones. *Adv Microb Physiol* 44:93-140.
- 346 28. Zhang L, Chaudhuri RR, Constantinidou C, Hobman JL, Patel MD, Jones AC, Sarti D,  
347 Roe AJ, Vlisidou I, Shaw RK, Falciani F, Stevens MP, Gally DL, Knutton S, Frankel G,  
348 Penn CW, Pallen MJ. 2004. Regulators encoded in the *Escherichia coli* type III  
349 secretion system 2 gene cluster influence expression of genes within the locus for  
350 enterocyte effacement in enterohemorrhagic *E. coli* O157:H7. *Infect Immun*  
351 72:7282-93.
- 352 29. Shulman A, Yair Y, Biran D, Sura T, Otto A, Gophna U, Becher D, Hecker M, Ron EZ.  
353 2018. The *Escherichia coli* Type III Secretion System 2 Has a Global Effect on Cell  
354 Surface. *MBio* 9.
- 355 30. Li H, Handsaker B, Wysoker A, Fennell T, Ruan J, Homer N, Marth G, Abecasis G,  
356 Durbin R, Genome Project Data Processing S. 2009. The Sequence Alignment/Map  
357 format and SAMtools. *1367-4803* 25:2078-9.
- 358 31. Koboldt DC, Larson DE, Wilson RK. 2013. Using VarScan 2 for Germline Variant  
359 Calling and Somatic Mutation Detection. *Curr Protoc Bioinformatics* 44:15 4 1-17.
- 360 32. Croucher NJ, Page AJ, Connor TR, Delaney AJ, Keane JA, Bentley SD, Parkhill J, Harris  
361 SR. 2015. Rapid phylogenetic analysis of large samples of recombinant bacterial  
362 whole genome sequences using Gubbins. *Nucleic Acids Res* 43:e15.

- 363 33. Stamatakis A. 2015. Using RAxML to Infer Phylogenies. *Curr Protoc Bioinformatics*  
364 51:6 14 1-14.
- 365 34. Sullivan MJ, Petty NK, Beatson SA. 2011. Easyfig: a genome comparison visualizer.  
366 1367-4803 27:1009-10.
- 367 35. Roe AJ, Yull H, Naylor SW, Woodward MJ, Smith DG, Gally DL. 2003. Heterogeneous  
368 surface expression of EspA translocon filaments by *Escherichia coli* O157:H7 is  
369 controlled at the posttranscriptional level. *Infect Immun* 71:5900-9.
- 370 36. Tree JJ, Roe AJ, Flockhart A, McAteer SP, Xu X, Shaw D, Mahajan A, Beatson SA, Best  
371 A, Lotz S, Woodward MJ, La Ragione R, Murphy KC, Leong JM, Gally DL. 2011.  
372 Transcriptional regulators of the GAD acid stress island are carried by effector  
373 protein-encoding prophages and indirectly control type III secretion in  
374 enterohemorrhagic *Escherichia coli* O157:H7. *Mol Microbiol* 80:1349-65.
- 375
- 376

377 **Figure Legends**

378 **Figure 1. Comparisons of the ETT2 operon between EAEC 042, ST69 (1#9) and O157:H7**

379 **Sakai.** Degree of identity is shown by the level of grey shading as indicated. Genes are  
380 colour coded according to putative function as shown.

381 **Figure 2. Comparison of the ETT2 operon in 24 ST69 strains.** Degree of identity is shown by  
382 the level of grey shading as indicated. Genes are colour coded according to putative  
383 function as shown.

384 **Figure 3. Comparison of elements of the ETT2 operon found in non-ST69 strains.** Degree of  
385 identity is shown by the level of grey shading as indicated. Genes are colour coded  
386 according to putative function as shown. Strains containing an essentially intact ETT2  
387 operon are shown highlighted in red.

388 **Figure 4. Comparison of the SelC operon in different strains.** Degree of identity is shown by  
389 the level of grey shading as indicated. Genes are colour coded according to putative  
390 function as shown.

391 **Figure 5. Activity of the eilA reporter in different strains and media. A and B.** Graphs show  
392 growth (Optical Density, panels A ) and reporter activity (GFP fluorescence, panels B) at the  
393 times indicated. The strains are: EC1#2 (A), EC1#19 (B), EC1#5 (C), EC1#21 (D), and EC1#9  
394 (E), all grown in LB:DMEM mixture . Each point is the mean of a triplicate determination;  
395 error bars (sem) are contained within the points. **C and D** strain EC1#2 is grown in the  
396 different media as indicated.

397 **Figure S1. Maximum likelihood phylogenetic tree of the strains shown in Figure 3.** Strains  
398 are colour coded according to their ST as shown. The 4 non-ST69 strains with an essentially  
399 intact ETT2 operon are indicated by an asterisk.

400 **Figure S2. Secreted proteins from ST69 grown in different media.** Secreted proteins from  
401 the ST69 strain grown in the media indicated were analysed by SDS-PAGE. Molecular weight  
402 markers (M) in kDa are shown to the left of the gel. The two proteins that were further  
403 analysed by tandem mass spectrometry are shown boxed and labelled 1 and 2.

404 **Supplementary Table 1. MASCOT summary data for the excised bands from Figure 6.** The  
405 summary header gives the top matching GenBank protein database accession number, the  
406 relative molecular mass, the total score for the matched protein, the number of peptides  
407 matched (Matches), unique peptides matched (Sequences), and exponentially modified  
408 protein abundance index (emPAI). The table columns show the identification number of the  
409 peptide (Query), the observed mass/charge ratio (Observed), the observed relative  
410 molecular mass (Mr (expt)), the calculated relative molecular mass (Mr (calc)), the  
411 difference in parts per million between the observed and calculated masses (ppm), number  
412 of missed cleavage sites (Miss), the score for each peptide which is  $-\log_{10}(\text{Expect})$ , the  
413 probability of observing the peptide by chance (Expect), the rank of the peptide match  
414 (Rank), the identity of the peptide match (Unique), where U signifies the peptide is unique  
415 to one protein family member, and the peptide sequence using the one letter amino-acid  
416 code (Peptide), where the residues that bracket the peptide sequence in the protein are  
417 also shown, delimited by periods.

418

419

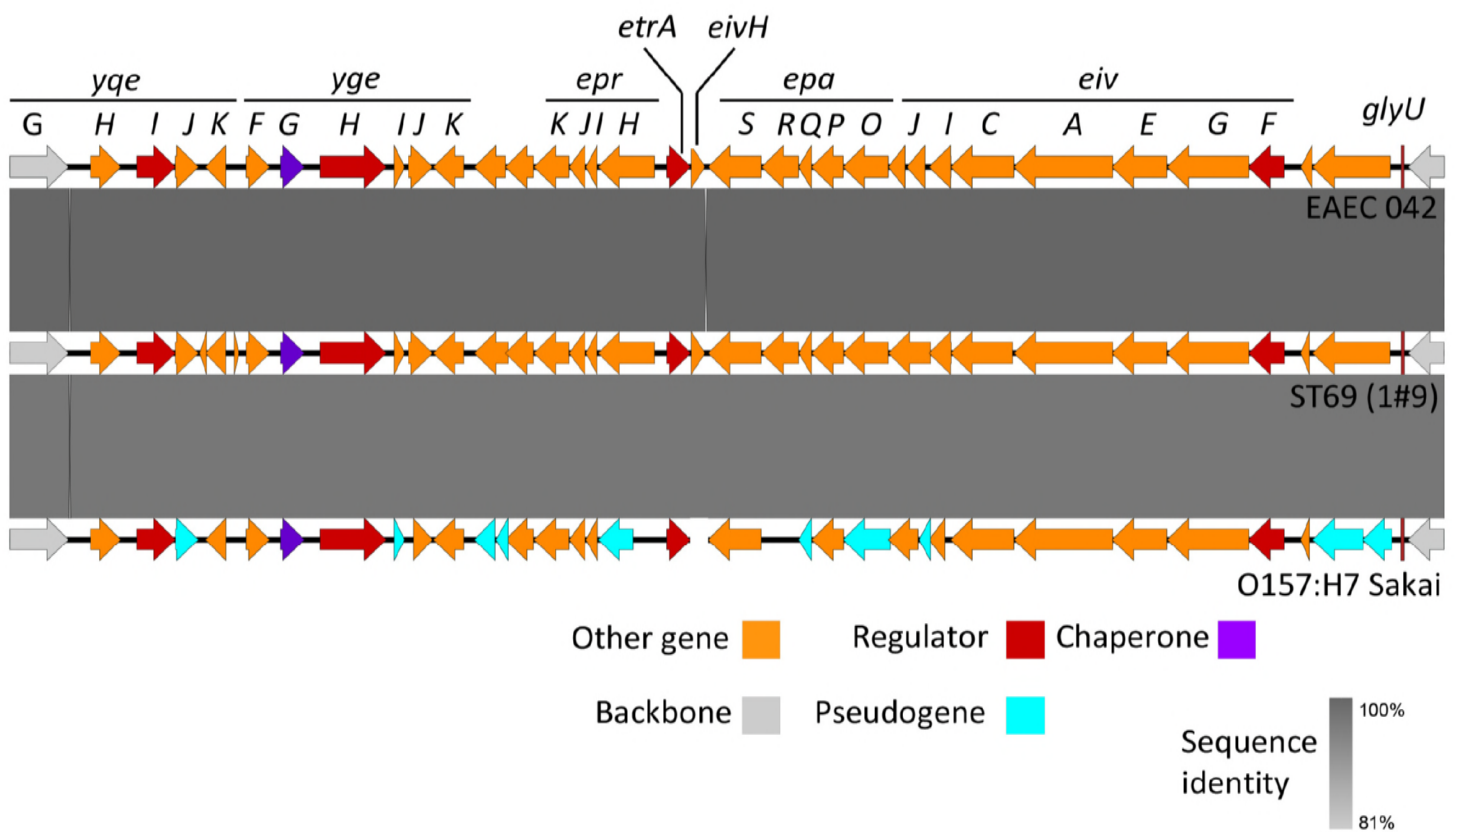

**Figure 1.** Comparisons of the ETT2 operon between EAEC 042, ST69 (1#9) and O157:H7 Sakai. Degree of identity is shown by the level of grey shading as indicated. Genes are colour coded according to putative function as shown.

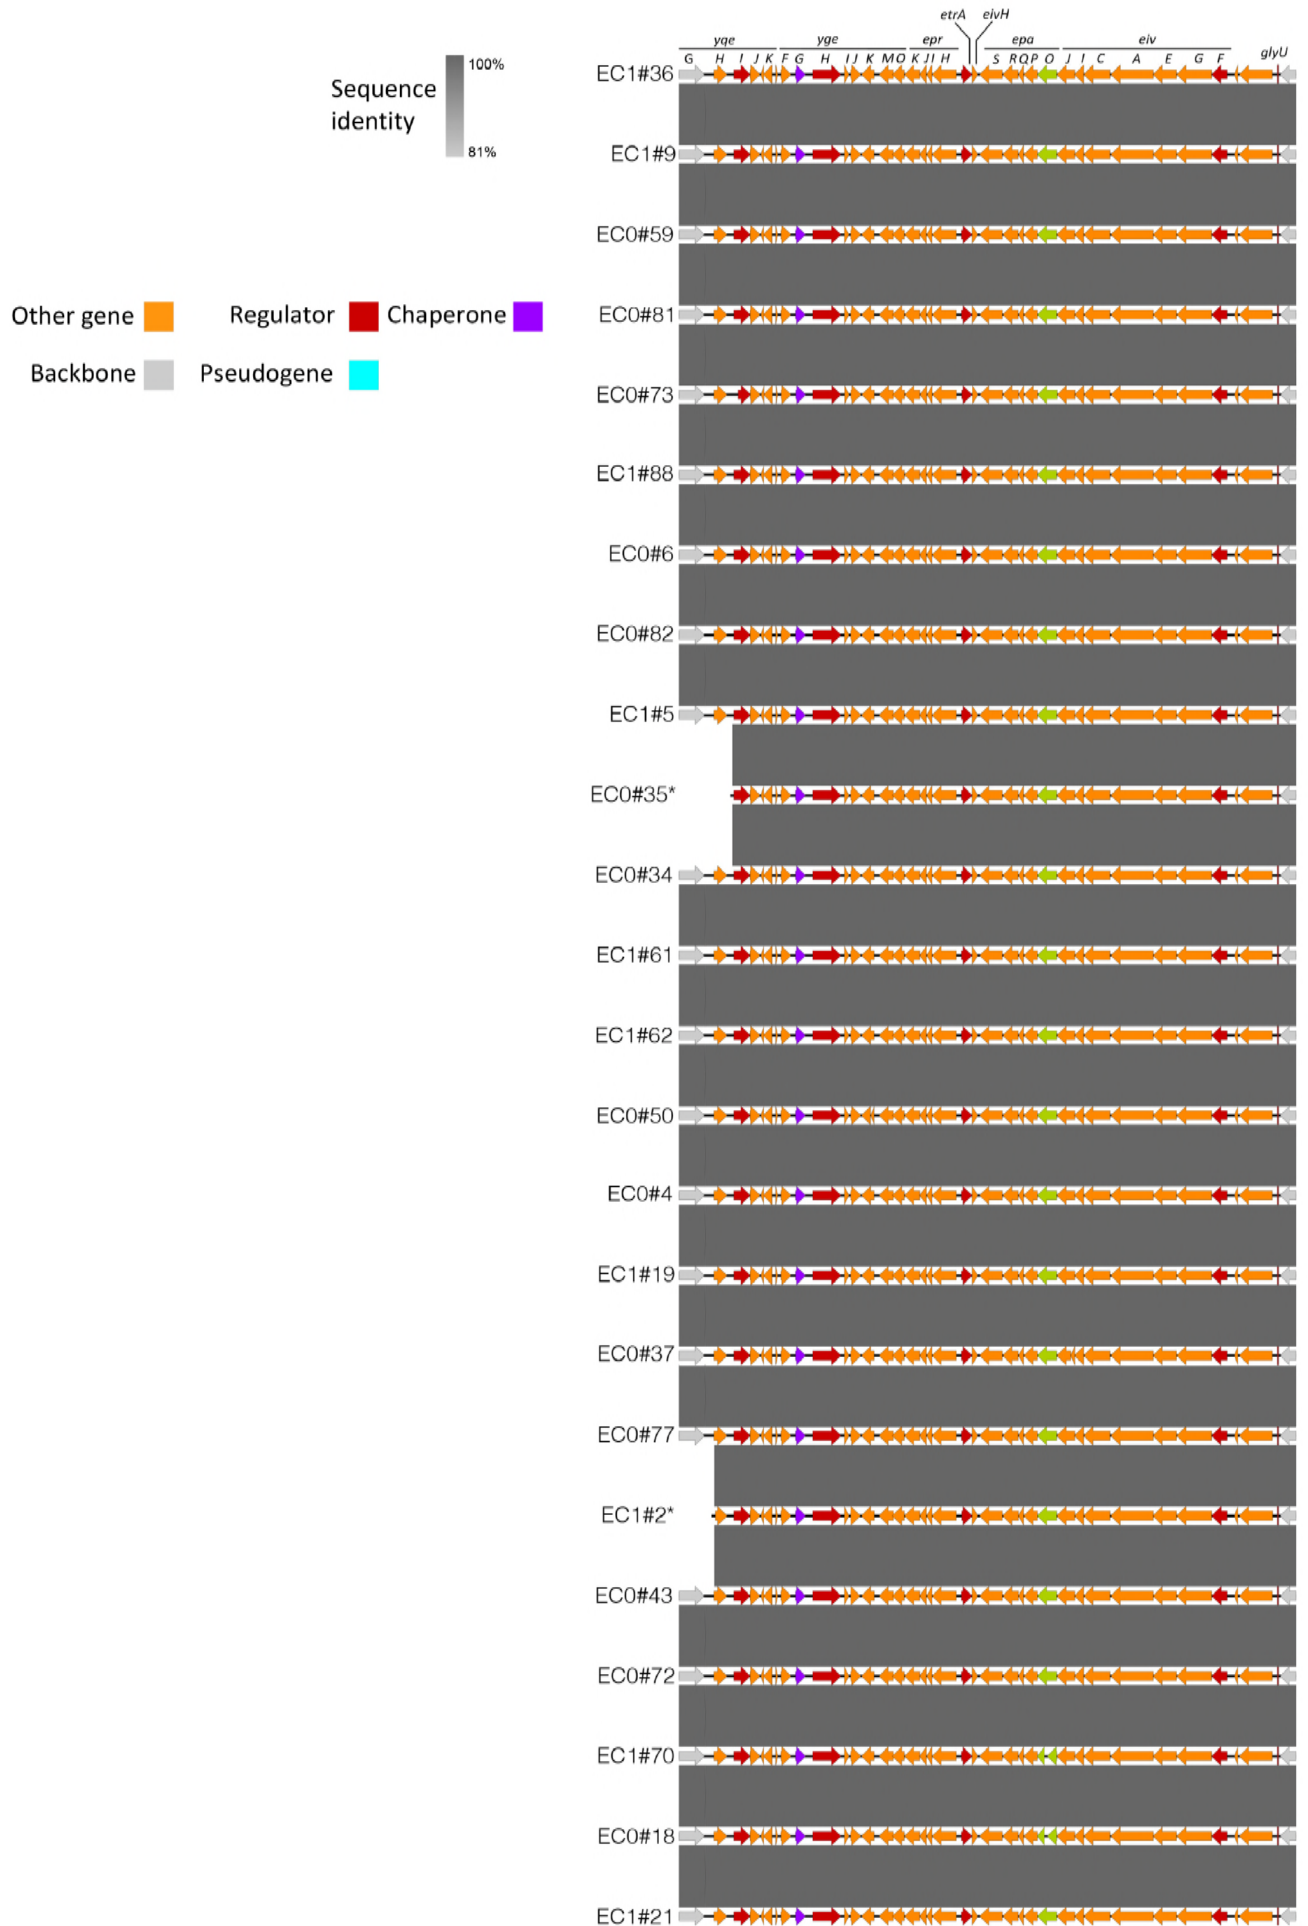

**Figure 2.** Comparison of the ETT2 operon in 24 ST69 strains. Degree of identity is shown by the level of grey shading as indicated. Genes are colour coded according to putative function as shown.

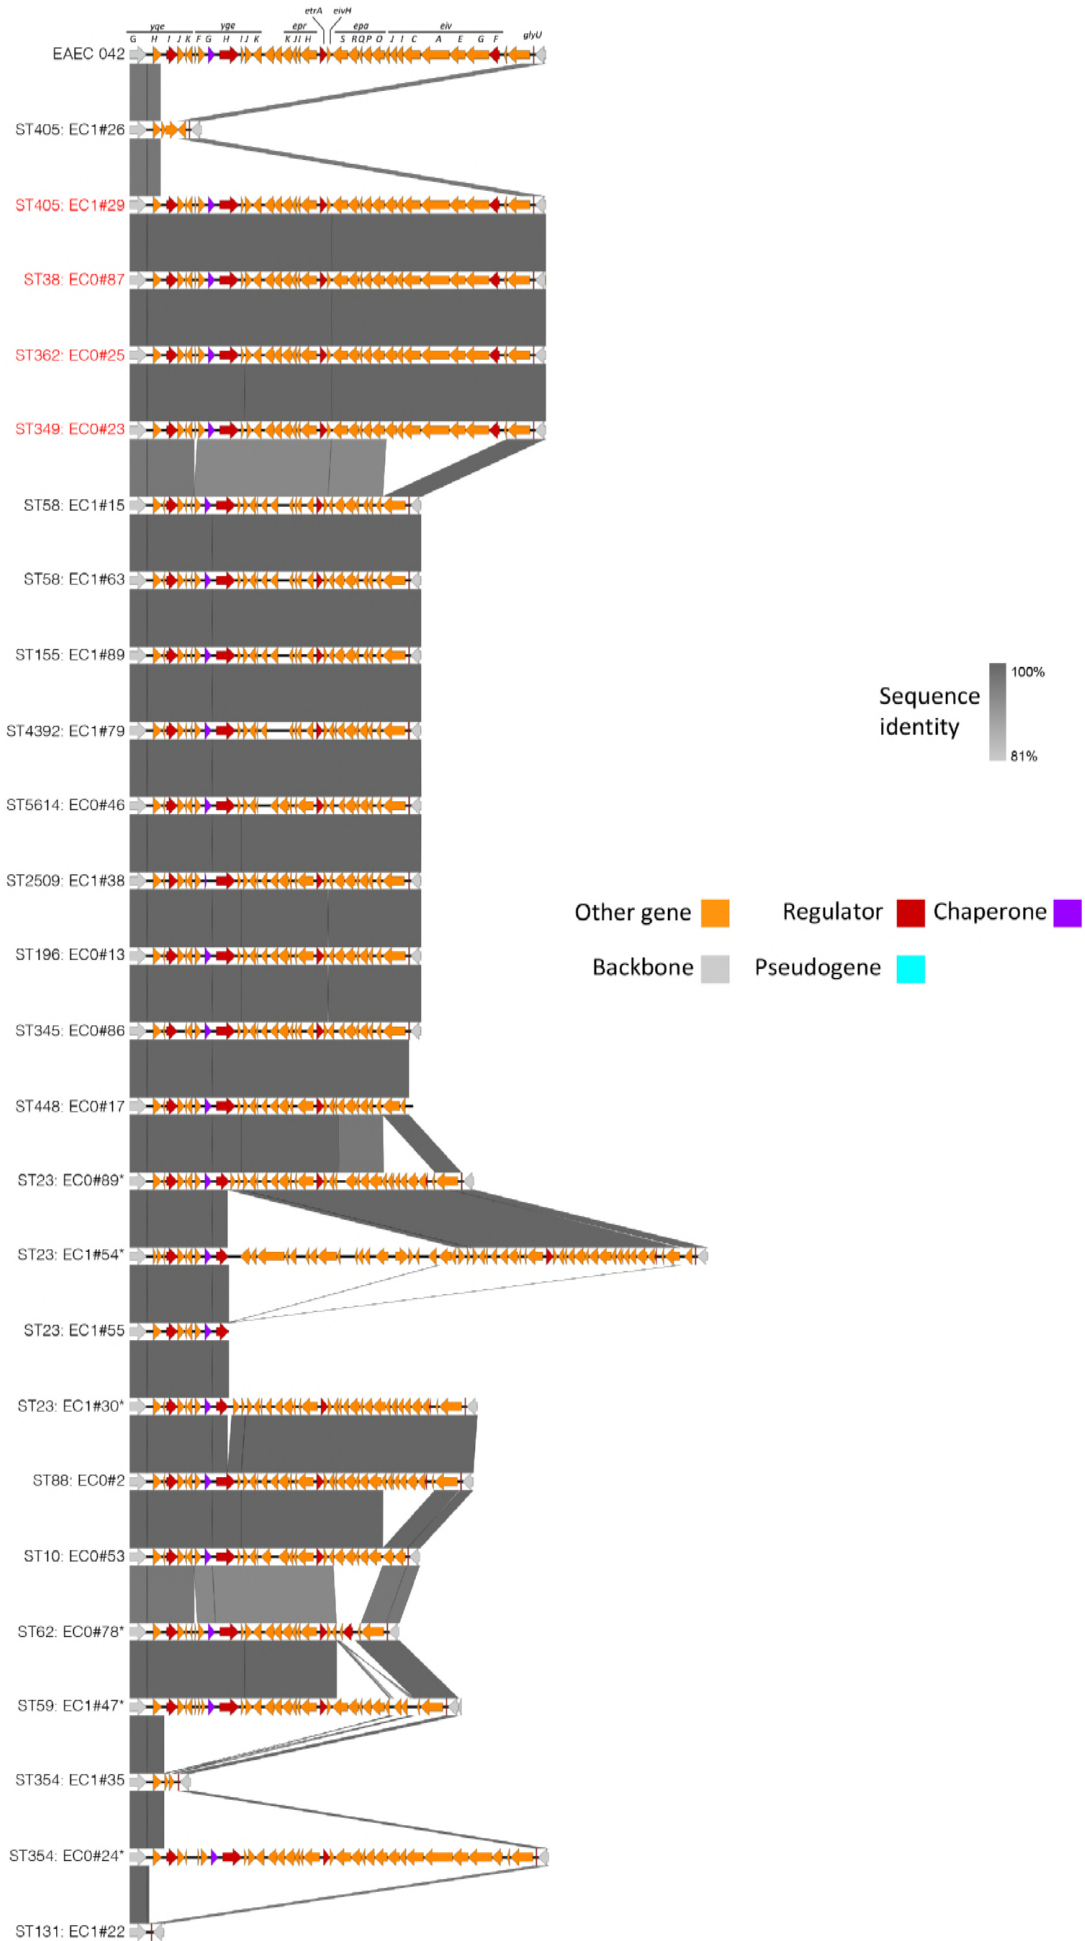

Figure 3. Comparison of elements of the ETT2 operon found in non-ST69 strains. Degree of identity is shown by the level of grey shading as indicated. Genes are colour coded according to putative function as shown. Strains containing an essentially intact ETT2 operon are shown highlighted in red.



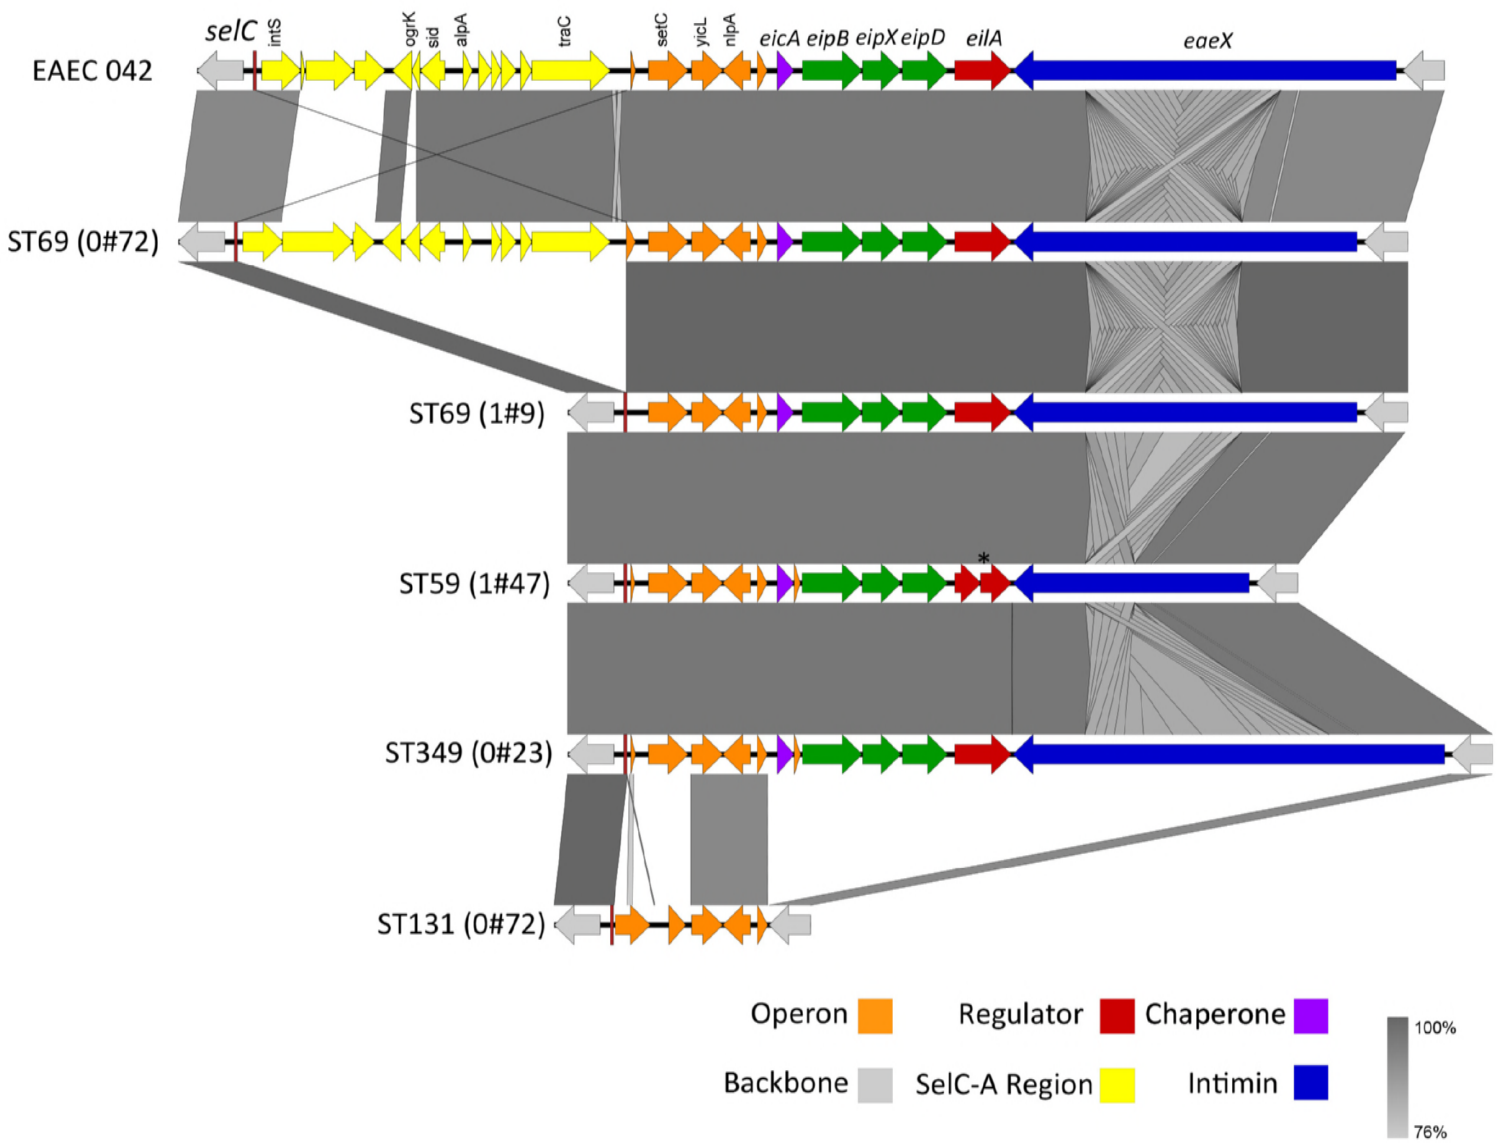

**Figure 4.** Comparison of the SelC operon in different strains. Degree of identity is shown by the level of grey shading as indicated. Genes are colour coded according to putative function as shown.

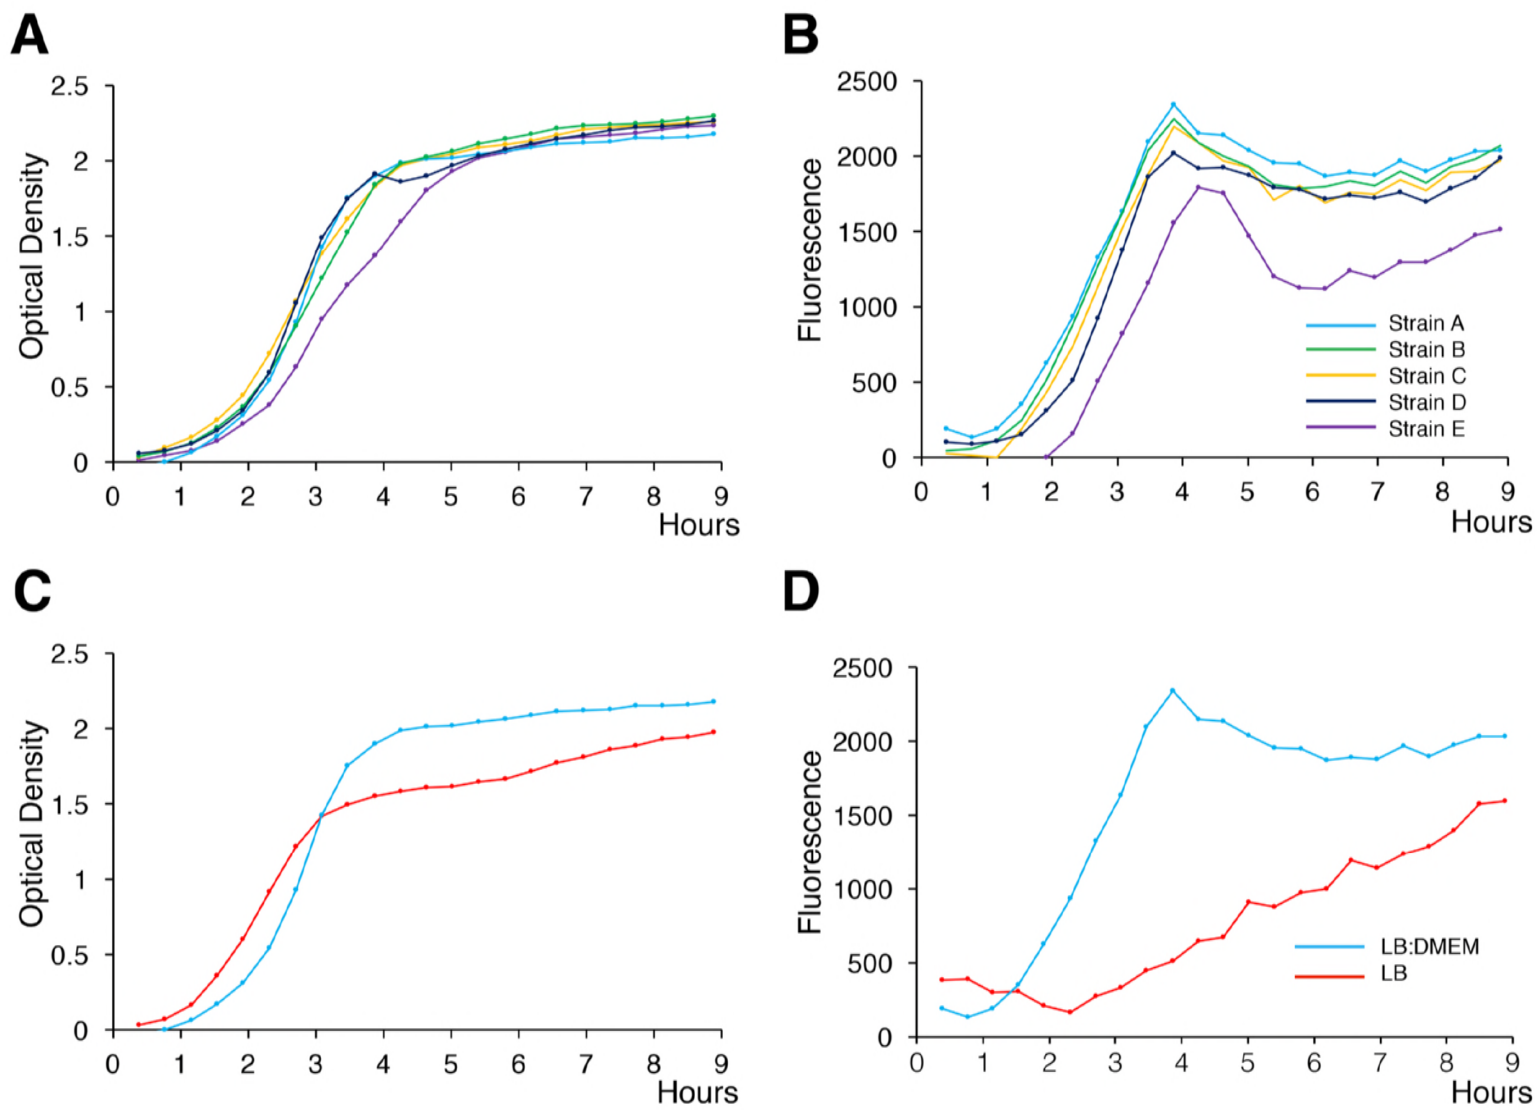

**Figure 5.** Activity of the *eilA* reporter in different strains and media. **A** and **B**. Graphs show growth (Optical Density, panels A) and reporter activity (GFP fluorescence, panels B) at the times indicated. The strains are: EC1#2 (A), EC1#19 (B), EC1#5 (C), EC1#21 (D), and EC1#9 (E), all grown in LB:DMEM mixture. Each point is the mean of a triplicate determination; error bars (sem) are contained within the points. **C** and **D** strain EC1#2 is grown in the different media as indicated.
